# Supplementary material
Source: publisher figshare collection journal article supplement (https://asha.figshare.com/ndownloader/files/38714175)
Supplement: Supplementary file 1 [file 38714175]

## **Supplemental Material S1.** Additional links.

### <sup>2</sup>IDEA Part B Evaluation Language Sections

<https://sites.ed.gov/idea/regs/b/d/300.304>

<https://sites.ed.gov/idea/regs/b/d/300.310>

<https://sites.ed.gov/idea/regs/b/d/300.320>

### <sup>3</sup>Oral Reading Fluency & Stuttering

[\*Oral Reading Fluency for School-Age Students Who Stutter\*](#) [PDF]

[\*Oral Reading Fluency Measures and Accommodations for School-Age Students Who Stutter\*](#)  
[PDF]

[\*Understanding How Oral Reading Assessment Affects Children Who Stutter\*](#) [PDF]

### <sup>4</sup>Stuttering Support Organizations

[National Stuttering Association](#)

[FRIENDS: The National Organization of Young People Who Stutter](#)

[SAY: Stuttering Association of the Young](#)

[British Stammering Association](#)

[International Stuttering Association](#)
